# Supplementary material
Source: HighWire-hosted journal article supplement (http://molpharm.aspetjournals.org/highwire/filestream/76969/field_highwire_adjunct_files/0/Revised_Supplementary.pdf)
Supplement: Revised_Supplementary.pdf [file Revised_Supplementary.pdf]

## **Supplementary Information**

### **Article Title**

Allosteric modulation of endogenous metabolites as an avenue for drug discovery

### **Authors**

Wootten D, Savage EE, Valant C, May LT, Sloop KW, Ficorilli J, Showalter AD, Willard FS, Christopoulos A, Sexton PM

### **Journal Title**

Molecular Pharmacology

**Supplemental Fig. 1. Metabolic breakdown of endogenous ligands to their metabolites and structures of the allosteric ligands used in this study.** (A) Acetylcholine is metabolised by acetylcholinesterases to choline and acetate. (B) Adenosine is metabolised by adenosine deaminase to inosine. (C) The peptide GLP-1(7-36)NH<sub>2</sub> is degraded by dipeptidyl peptidase IV to the inert metabolite GLP-1(9-36)NH<sub>2</sub> (the primary amino acid sequences are shown). (D) Structures of the four allosteric ligands used in this study.

**Supplemental Fig. 2. The allosteric agonist LY2033298 displays positive allosteric modulation of the metabolite choline in GTP $\gamma$ S binding in membranes expressing M2 mAChR.** Interaction studies between LY2033298 and ACh (A) or Ch (B) GTP $\gamma$ S binding assays. All values are mean  $\pm$  SEM of three independent experiments performed in duplicate.

**Supplemental Fig. 3. The allosteric agonist LY2033298 shows weak positive allosteric modulation of the metabolite choline in competition binding assays in membranes expressing M2 mAChR.** Interaction studies between LY2033298 and Ch in a competition radioligand binding assay using the radioligand [<sup>3</sup>H]NMS. Curves were fitted using a one site modulator plus allosteric ligand model. The log $\alpha$  for NMS was fitted to 0.5 as determined in Valant *et al* 2012. All values are mean  $\pm$  SEM of three independent experiments performed in duplicate.

**Supplemental Fig. 4. Small molecule ligands of the GLP-1R do not modulate binding affinity of the GLP-1(7-36)NH<sub>2</sub> or its metabolite GLP-1R(9-36)NH<sub>2</sub> in competition binding experiments in intact cells expressing human GLP-1R.** Effects of increasing concentrations of

either Compound 2 (A and B) or BETP (C and D) on the inhibition of  $^{125}$ I-exendin(9-39) binding by GLP-1(7-36)NH<sub>2</sub> (A and C) or GLP-1(9-36)NH<sub>2</sub> (B and D). Data are normalised to specific radioligand binding. Nonspecific binding was determined by inhibition of  $^{125}$ I-exendin(9-39) by 1  $\mu$ M exendin(9-39). All values are mean  $\pm$  SEM of four independent experiments performed in duplicate.

**Supplemental Fig. 5. Ex vivo and in vivo studies reveal allosteric modulation of the GLP-1 metabolite at the GLP-1R leads to insulin secretion.** (A) Insulin concentrations from cultures of SD rat islets incubated in media containing low glucose (2.8mM), high glucose (11.2 mM), GLP-1(7-36)NH<sub>2</sub> (100 nM), BETP (1  $\mu$ M) and GLP-1(9-36)NH<sub>2</sub> (1 and 10  $\mu$ M) in the presence and absence of BETP (1  $\mu$ M). Islet treatments were performed for 90 min. (B) Timecourse of plasma insulin concentrations in fasted, anaesthetised animals treated with either vehicle, GLP-1(7-36)NH<sub>2</sub> (3 nmol/kg), GLP-1(9-36)NH<sub>2</sub> (400 nmol/kg), BETP (10 mg/kg) or co-administration of BETP and GLP-1(9-36)NH<sub>2</sub>, immediately prior to intravenous administration of a glucose bolus (0.5 g/kg). Inset, AUC<sub>0-20min</sub> of the insulin secretion for the various treatment groups. All results are expressed as mean  $\pm$  SEM of five experiments, (\* =  $p < 0.05$  as determined using a one way anova followed by Dunnett's comparison to vehicle group).

**Supplemental Fig. 6. In vivo studies reveal BETP does not alter the pharmacokinetics of GLP-1(9-36)NH<sub>2</sub>.** Time course of total plasma GLP-1 levels in fasted anaesthetized animals treated with either vehicle, GLP-1(7-36)NH<sub>2</sub> (3 nmol/kg), GLP-1(9-36)NH<sub>2</sub> (150 nmol/kg), BETP (5 mg/kg) or GLP-1(9-36)NH<sub>2</sub> (150 nmol/kg) in the presence of BETP (5 mg/kg) immediately prior to intravenous administration of a glucose bolus (0.5 g/kg). Inset. Same data set with smaller y axis. Results are expressed as mean  $\pm$  SEM of six experiments (\* =  $p < 0.05$  as determined using a one way anova followed by Dunnett's comparison to vehicle group).

# Supplementary Figure 1.

**A**

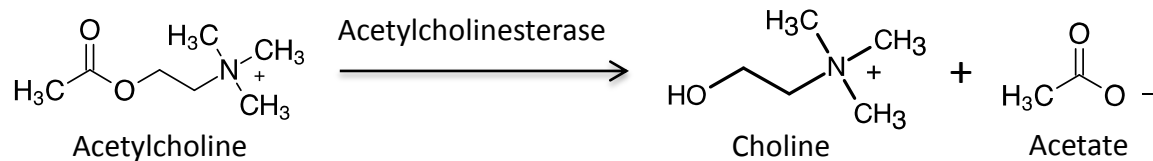

**B**

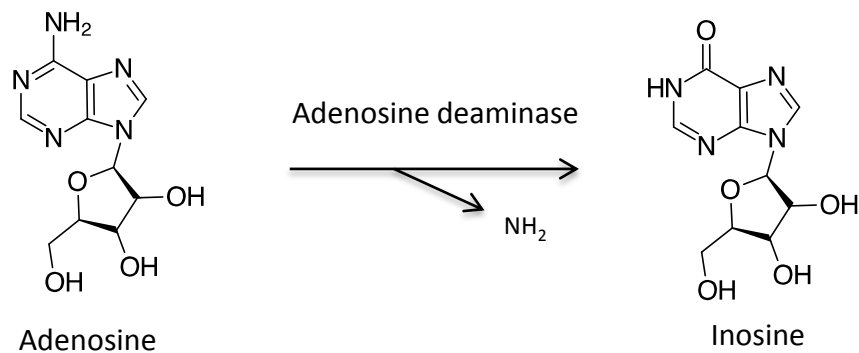

**C**

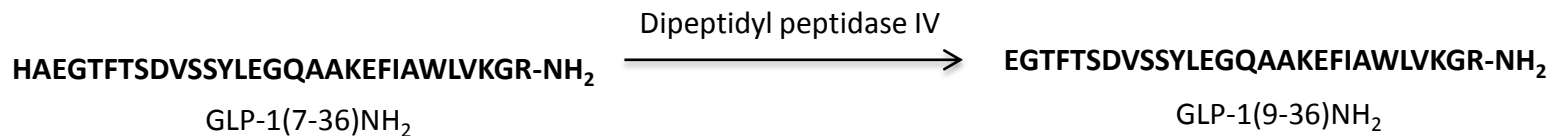

**D**

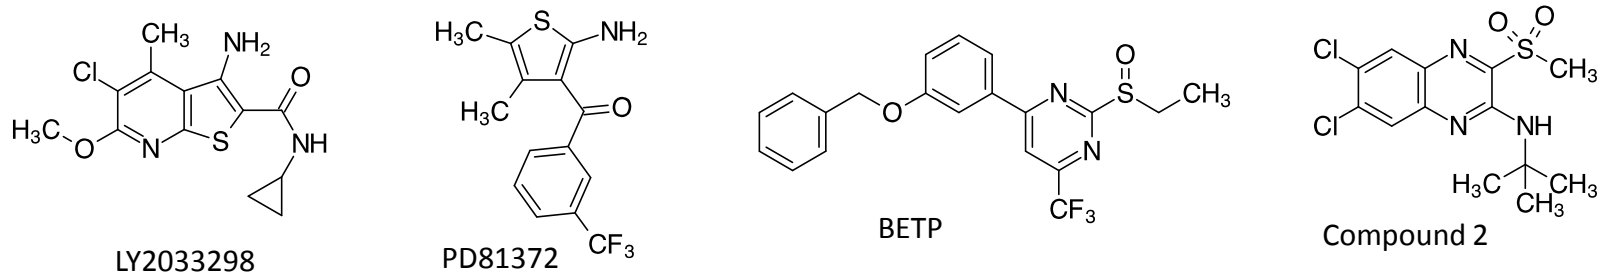

# Supplemental Fig. 2

## A.

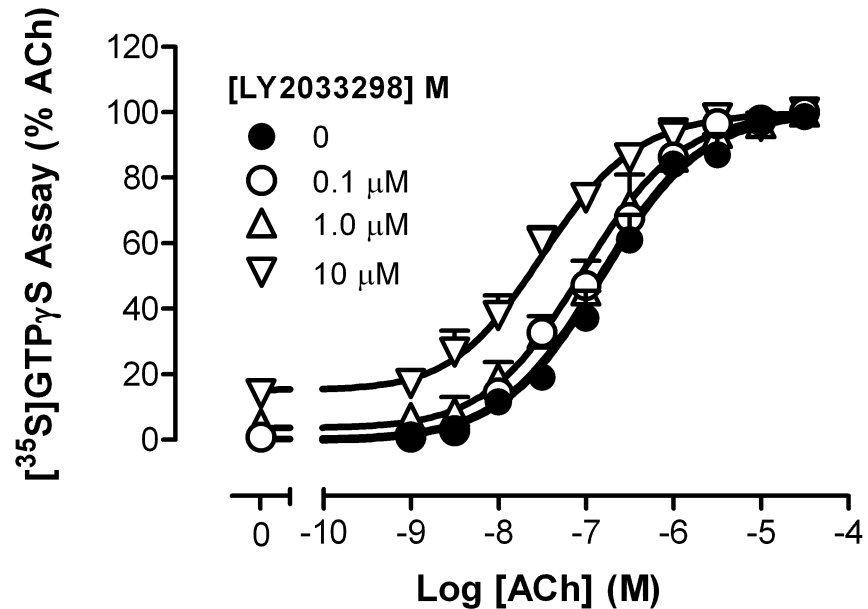

## B.

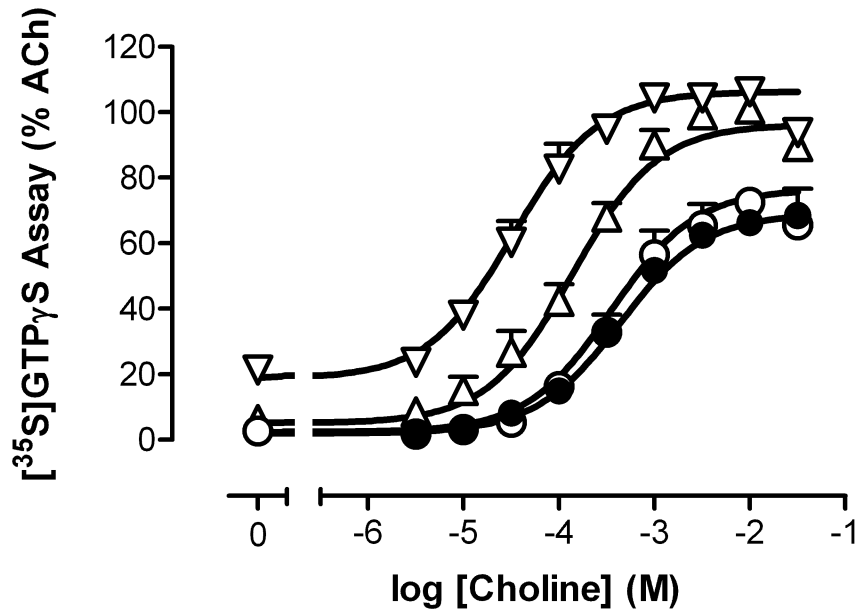

# Supplemental Fig. 3

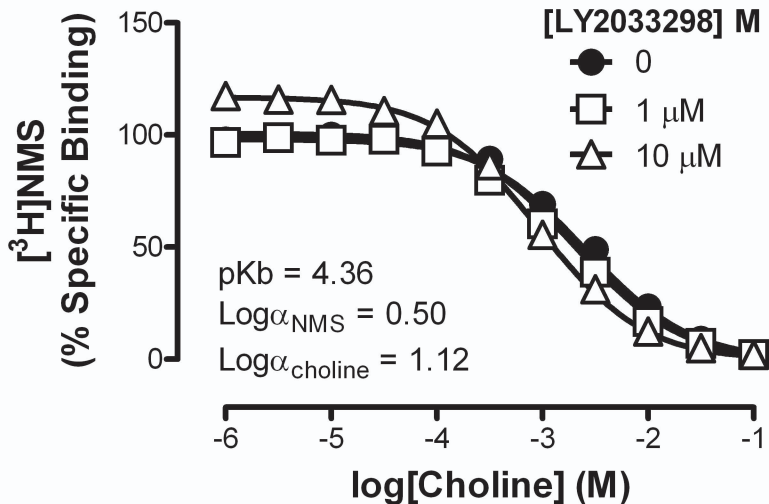

# Supplemental Figure 4.

**A.**

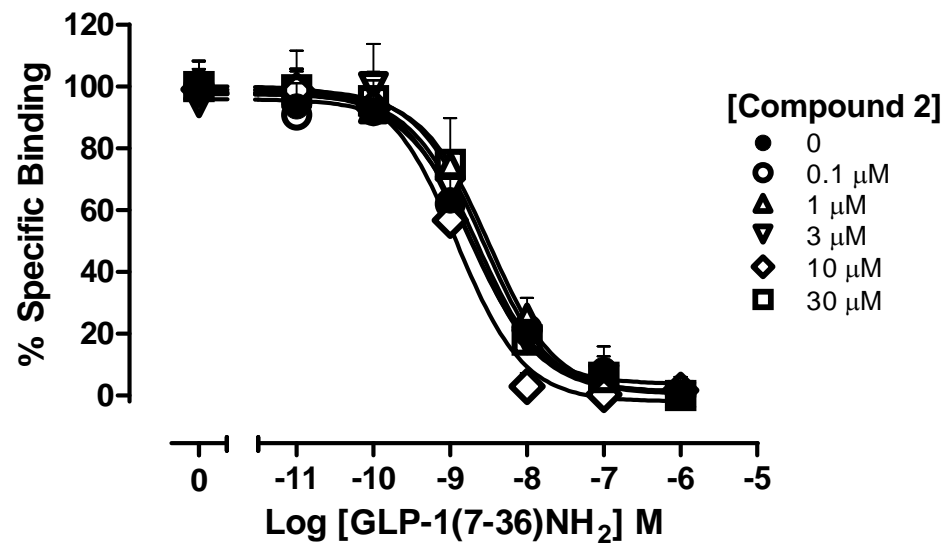

**B.**

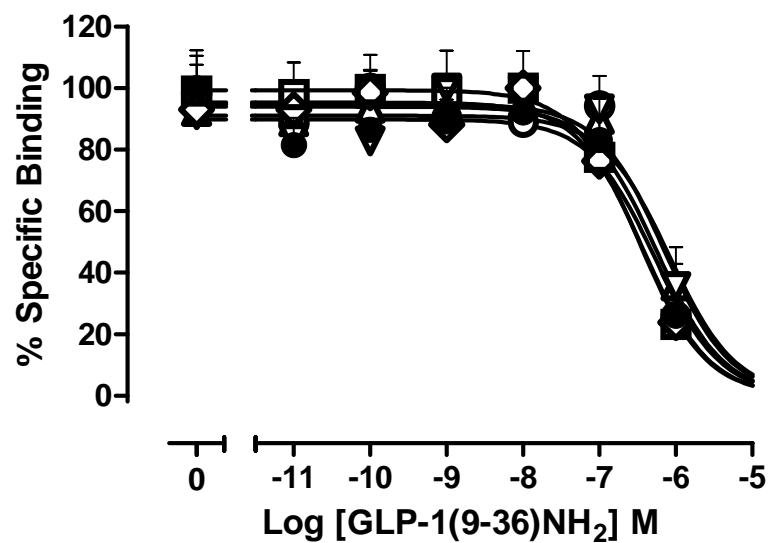

**C.**

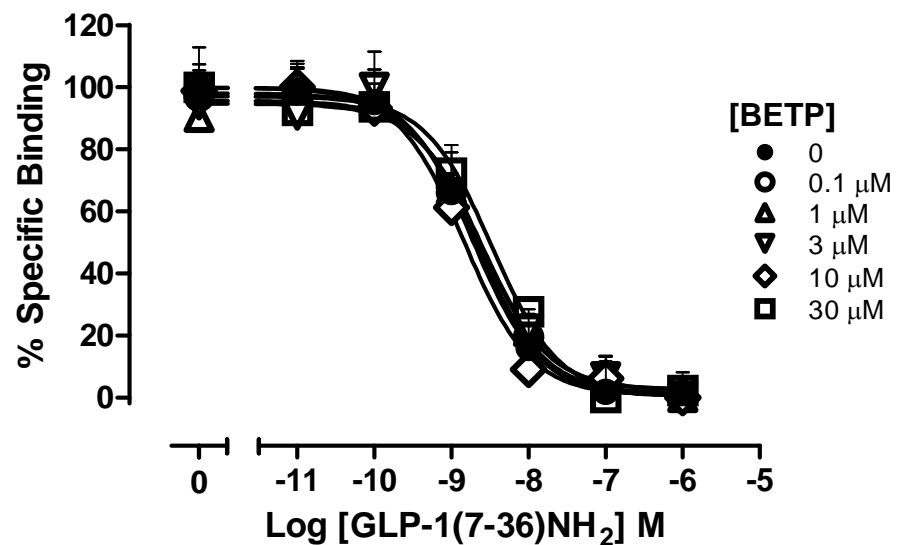

**D.**

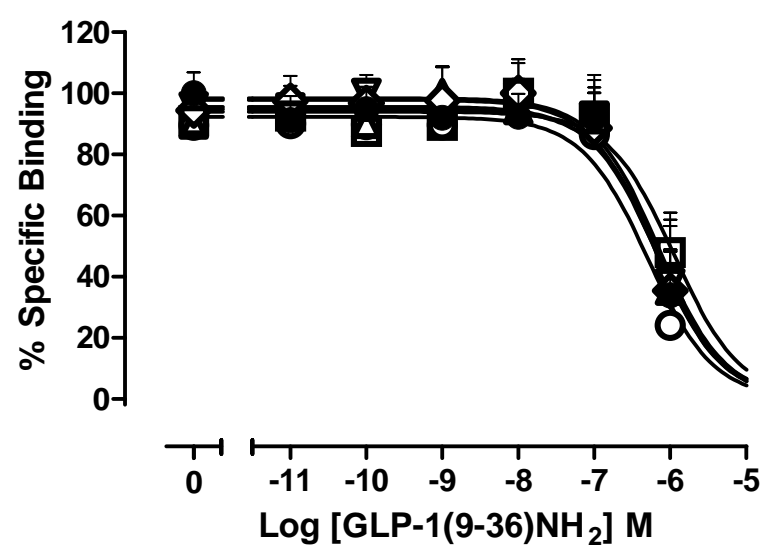

# Supplemental Figure 5.

**A.**

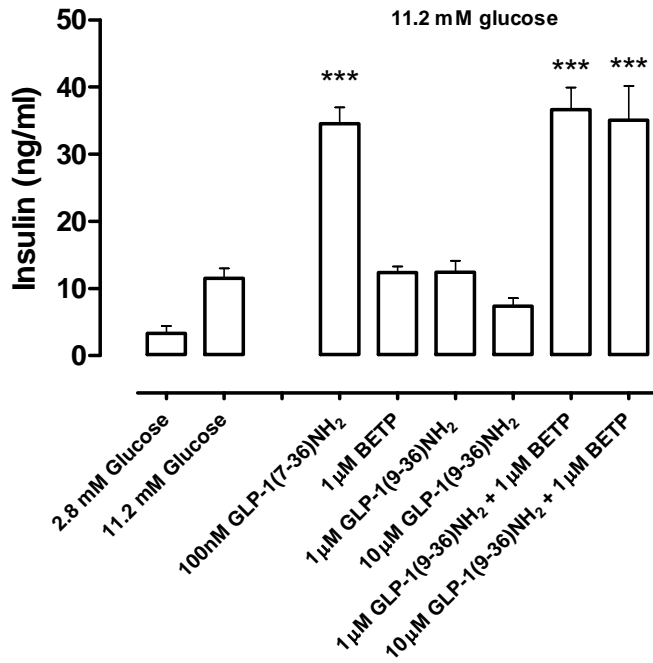

**B.**

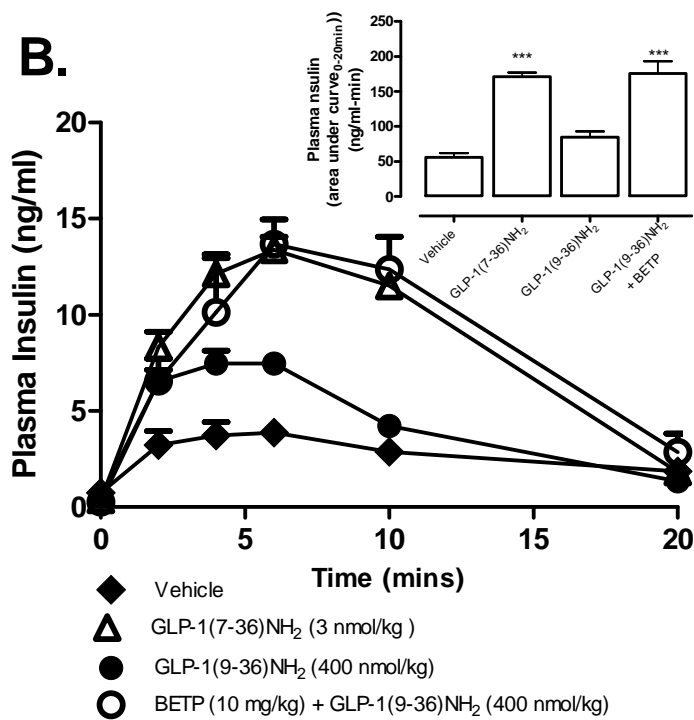



# Supplementary Fig. 6

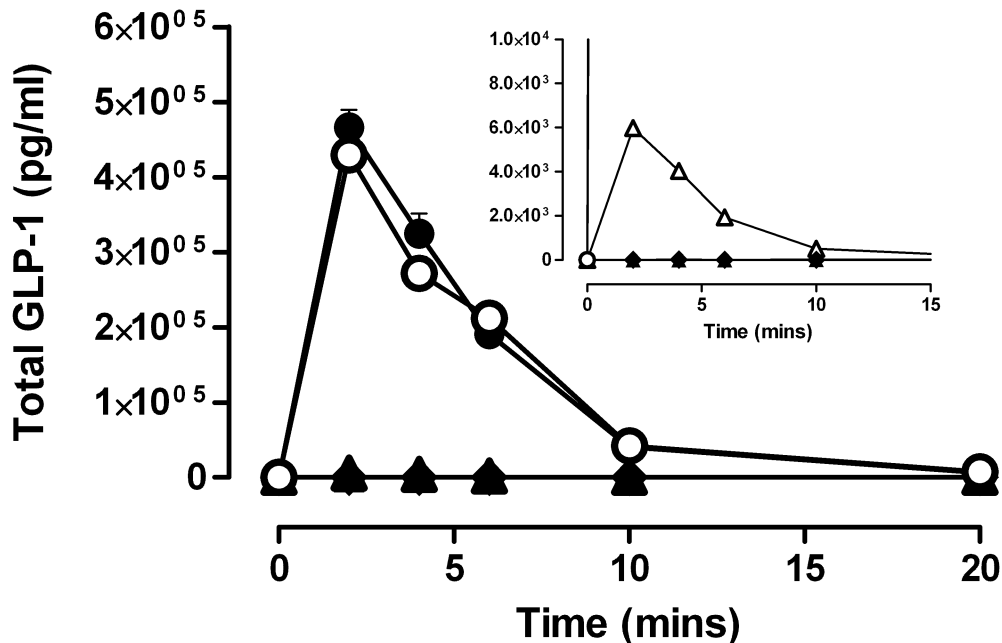

- ◆ Vehicle + Vehicle
- △ Vehicle + GLP-1(7-36)NH<sub>2</sub> (3 nmol/kg)
- Vehicle + GLP-1(9-36)NH<sub>2</sub> (150 nmol/kg)
- ▲ BETP (5 mg/kg) + Vehicle
- BETP (5 mg/kg) + GLP-1(9-36)NH<sub>2</sub> (150nmol/kg)
